# Supplementary material for: The Potential of Endophytic Fungi for Enhancing the Growth and Accumulation of Phenolic Compounds and Anthocyanin in Maled Phai Rice (Oryza sativa L.)
Source: MDPI journal article supplement (doi:10.3390/jof9090937), 2023-09-16
Supplement: s1 [file s1]

**Table S1.** Correlation between endophytic fungi and % colonization with plant parameters of rice at harvest stage.

| Correlation        | Root<br>colonization | Height | No. of<br>tillers | Total<br>chlorophyll | Pn     | Sc      | Tr      | WUE    | No. of<br>panicles | Total<br>seed<br>weight | Total<br>shoot<br>weight | Root<br>FW | Root<br>DW | TAC    | TPC    | Antioxidant | N      | P      |
|--------------------|----------------------|--------|-------------------|----------------------|--------|---------|---------|--------|--------------------|-------------------------|--------------------------|------------|------------|--------|--------|-------------|--------|--------|
| Height             | 0.93**               |        |                   |                      |        |         |         |        |                    |                         |                          |            |            |        |        |             |        |        |
| No. of tillers     | 0.42ns               | 0.81ns |                   |                      |        |         |         |        |                    |                         |                          |            |            |        |        |             |        |        |
| Total chlorophyll  | 0.67**               | 0.83** | 0.23ns            |                      |        |         |         |        |                    |                         |                          |            |            |        |        |             |        |        |
| Pn                 | 0.88**               | 0.85** | 0.06ns            | 0.80**               |        |         |         |        |                    |                         |                          |            |            |        |        |             |        |        |
| Sc                 | 0.88**               | 0.80** | -0.124ns          | 0.60**               | 0.91** |         |         |        |                    |                         |                          |            |            |        |        |             |        |        |
| Tr                 | 0.83**               | 0.82** | -0.047ns          | 0.72**               | 0.84** | 0.77**  |         |        |                    |                         |                          |            |            |        |        |             |        |        |
| WUE                | 0.24ns               | 0.22ns | 0.27ns            | 0.29ns               | 0.47ns | 0.40ns  | -0.08ns |        |                    |                         |                          |            |            |        |        |             |        |        |
| No. of panicles    | -0.14ns              | 0.65ns | 0.90**            | 0.38ns               | 0.13ns | -0.14ns | 0.58ns  | 0.23ns |                    |                         |                          |            |            |        |        |             |        |        |
| Total seed weight  | 0.62**               | 0.79** | 0.45ns            | 0.78**               | 0.73** | 0.67**  | 0.65**  | 0.92ns | 0.50**             |                         |                          |            |            |        |        |             |        |        |
| Total shoot weight | 0.08ns               | 0.25ns | 0.68**            | 0.53*                | 0.37ns | 0.16ns  | 0.07ns  | 0.55*  | 0.65**             | 0.63**                  |                          |            |            |        |        |             |        |        |
| Root FW            | 0.19ns               | 0.34ns | 0.70**            | 0.42ns               | 0.38ns | 0.29ns  | 0.32ns  | 0.26ns | 0.60**             | 0.65**                  | 0.46ns                   |            |            |        |        |             |        |        |
| Root DW            | 0.01ns               | 0.21ns | 0.89**            | 0.41ns               | 0.23ns | 0.05ns  | 0.11ns  | 0.30ns | 0.88**             | 0.61**                  | 0.73**                   | 0.69**     |            |        |        |             |        |        |
| TAC                | 0.68**               | 0.84** | 0.29ns            | 0.91**               | 0.75** | 0.54*   | 0.66**  | 0.28ns | 0.43ns             | 0.86**                  | 0.60**                   | 0.45ns     | 0.54*      |        |        |             |        |        |
| TPC                | 0.72**               | 0.83** | 0.41ns            | 0.89**               | 0.81** | 0.62**  | 0.77**  | 0.25ns | 0.49*              | 0.88**                  | 0.50*                    | 0.62**     | 0.56*      | 0.89** |        |             |        |        |
| Antioxidant        | 0.78**               | 0.75** | 0.12ns            | 0.60**               | 0.67** | 0.53*   | 0.77**  | 0.18ns | 0.21ns             | 0.58*                   | 0.10ns                   | 0.35ns     | 0.31ns     | 0.67** | 0.79** |             |        |        |
| N                  | 0.51*                | 0.67** | 0.66**            | 0.81**               | 0.67** | 0.49*   | 0.56*   | 0.37ns | 0.70**             | 0.90**                  | 0.73**                   | 0.66**     | 0.77**     | 0.86** | 0.88** | 0.54*       |        |        |
| P                  | -0.06ns              | 0.17ns | 0.93**            | 0.49*                | 0.22ns | -0.03ns | 0.11ns  | 0.29ns | 0.92**             | 0.63**                  | 0.79**                   | 0.71**     | 0.94**     | 0.56*  | 0.58*  | 0.21ns      | 0.85** |        |
| K                  | 0.39ns               | 0.57*  | 0.75*             | 0.76**               | 0.58*  | 0.38ns  | 0.49*   | 0.31ns | 0.77**             | 0.88**                  | 0.76**                   | 0.70**     | 0.83**     | 0.82** | 0.85** | 0.49*       | 0.98** | 0.88** |

\*\* , Significant difference at  $P \leq 0.01$ ; \*, Significant difference at  $P \leq 0.05$ ; ns, not significant
